# Supplementary material for: Effect of N-Vinyl-2-Pyrrolidone (NVP), a Bromodomain-Binding Small Chemical, on Osteoblast and Osteoclast Differentiation and Its Potential Application for Bone Regeneration
Source: MDPI journal article supplement (doi:10.3390/ijms222011052), 2021-10-13
Supplement: s1 [file s1]

•Molecular Formula  $C_5H_9NO$   
 •Average mass 99.131 Da

**N-methylpyrrolidone (NMP)**

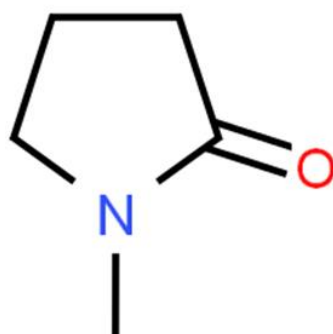

•Molecular Formula  $C_6H_9NO$   
 •Average mass 111.142 Da

**1-Vinyl-2-pyrrolidone (NVP)**

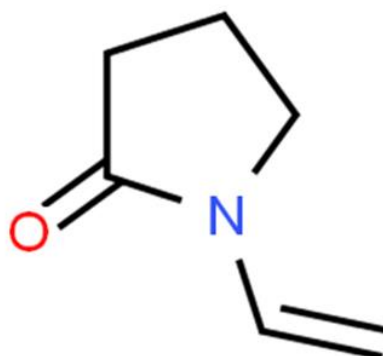

**Figure S1:** chemical structures of NMP and NVP

| Gene   | Species | Company | Catalog Nr. |
|--------|---------|---------|-------------|
| ALP    | Mouse   | QIAGEN  | QT00157717  |
| Runx2  | Mouse   | QIAGEN  | QT00102193  |
| TRAP   | Mouse   | QIAGEN  | QT00131012  |
| NFATc1 | Mouse   | QIAGEN  | QT00167692  |
| GAPDH  | Mouse   | QIAGEN  | QT01658692  |
| Rsp18  | Mouse   | QIAGEN  | QT02448075  |

**Table S1:** Primers used in qRT-PCR experiments.

| Antibody                   | Company                   | Catalog Nr. |
|----------------------------|---------------------------|-------------|
| GAPDH                      | Cell Signaling Technology | #5174       |
| pSmad 1/5/9                | Cell Signaling Technology | #13820      |
| Anti-rabbit IgG HRP-linked | Cell Signaling Technology | #7074       |
| NFATc1                     | Santa Cruz Biotechnology  | Sc-7294     |
| c-Fos                      | Santa Cruz Biotechnology  | Sc-398595   |

**Table S2:** Antibodies used in Western blot and immunofluorescence experiments
